# Supplementary material for: Effects of anthropogenic pollutants on biogenic secondary organic aerosol formation in the atmosphere of Mt. Hua, China
Source: Copernicus journal article supplement (doi:10.5194/acp-25-11975-2025), 2025-10-02
Supplement: Supplementary file 1 [file acp-25-11975-2025-supplement.pdf]

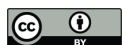

*Supplement of*

**Effects of anthropogenic pollutants on  
biogenic secondary organic aerosol formation  
in the atmosphere of Mt. Hua, China**

**Can Wu et al.**

*Correspondence to:* Gehui Wang ([ghwang@geo.ecnu.edu.cn](mailto:ghwang@geo.ecnu.edu.cn))

The copyright of individual parts of the supplement might differ from the article licence.

## **S1. Random forest analysis and mantel's test for BSOA tracer**

Random forest (RF) was initially introduced by Breiman (2001) to serve as a powerful tool for regression and prediction with high accuracy; and it has been widely applied in environmental field (e.g., pollutants prediction), even the data have complex nonlinear relationships and interactions. In this study, a regression model based on RF algorithm was built to reveal the key factors influencing the BSOA formation at MS site. The potential factors, including  $O_3$ ,  $NO_2$ ,  $SO_4^{2-}$ ,  $NH_4^+$ , ALWC,  $H^+$ , RH and T, were regarded as explanatory variables for the daytime isoprene-derived SOA prediction. For robust model development and validation, 70% of the original input data were randomly allocated to build the RF model (i.e., training dataset), and the remaining 30% served as the testing dataset for evaluating the model performance. The RF model is user-friendly with only two critical parameters constantly being optimized, namely the number of trees grown ( $n_{tree}$ ) and the number of variables split at each node ( $m_{try}$ ). By systematically comparing the results of different parameters settings, we identified that setting  $n_{tree}$  to 100 and  $m_{try}$  to 4 can provide the optimal prediction accuracy, which can be established by the statistical metrics as shown in Table S1. From Table S1, we can note that a well performance of the model in explaining the importance of these factors to daytime  $BSOA_I$ , with a robust correlation between predicted and observed BSOA ( $R^2=0.8$ ). Additionally, the mantel test, as a statistical tool initiated by Mantel (1967), is commonly used for investigating relationships among two matrices. To elucidate the relationships between three types of BSOA tracers and potential influencing factors, a Mantel test was conducted using a network platform (<https://www.omicstudio.cn/tool>, last accessed: Jan. 10<sup>th</sup>, 2025).

## S2. Estimation the IEPOX reactive uptake on particles at MS site

To quantitatively assess the effects of aerosol water on isoprene-derived SOA formation, the pseudo-first-order heterogeneous reaction rate constant for IEPOX uptake to particle ( $k_{\text{het}}$ , 1/s) is calculated using the method of Gaston et al. (2014), in which the gas phase diffusion is not considered due to its minor effects on  $k_{\text{het}}$  (eq. (1)). And the possibility of IEPOX reactive uptake (i.e., uptake coefficient,  $\gamma_{\text{IEPOX}}$ ) was also calculated using equations S2-S3.

$$k_{\text{het}} \approx \frac{\gamma_{\text{IEPOX}} S_a \omega}{4} \quad (\text{S1})$$

$$\frac{1}{\gamma_{\text{IEPOX}}} = \frac{R_p \omega}{4 D_g} + \frac{1}{\alpha} + \frac{1}{\Gamma_{\text{aq}}} \quad (\text{S2})$$

$$\Gamma_{\text{aq}} = \frac{4 V R T H_{\text{aq}} k_{\text{aq}}}{S_a \omega} \quad (\text{S3})$$

$$k_{\text{aq}} = (k_{\text{H}^+} [\text{H}^+]) + (k_{\text{nuc}} [\text{nuc}] \alpha_{\text{H}^+}) + k_{\text{ga}} [\text{ga}] \quad (\text{S4})$$

Where  $S_a$  represents the total surface area concentration of particles ( $\text{cm}^2/\text{cm}^3$ ); The  $S_a$ , particle radius ( $R_p$ , m) and total particle volume ( $V$ ,  $\text{cm}^3/\text{cm}^3$ ) were measured using a scanning mobility particle sizer (SMPS) here, more details can be found elsewhere (Cao, 2018). In equations S2-S3,  $\omega$  is the mean molecular speed of an epoxide molecule (231 m/s, at 298 K),  $D_g$  the gas-phase diffusion coefficient ( $0.1 \text{ cm}^2/\text{s}$ );  $\alpha$  is the mass accommodation coefficient, with a mean value of 0.1.  $R$  is the universal gas constant ( $\text{L atm/mol K}$ ),  $T$  represent the temperature (K). The Henry's law coefficient in the aqueous phase,  $H_{\text{aq}}$ , is estimated to be  $1.7 \times 10^8 \text{ (M/atm)}$ . The pseudo-first-order aqueous-phase rate constant,  $k_{\text{aq}}$  (1/s), is based on an acid-catalyzed, epoxide ring-open mechanism.  $k_{\text{H}^+}$  is the reaction rate taken to be 0.036 (M/s);  $[\text{H}^+]$  and  $\alpha_{\text{H}^+}$  are the concentration (mol/L) and activity of proton, respectively.  $k_{\text{nuc}}$  is the reaction rate due to the presence of specific nucleophiles (e.g., sulfate, nitrate), which is estimated to be  $2.0 \times 10^4 \text{ (M/s)}$ ;  $[\text{nuc}]$  is the nucleophiles concentration (mol/L).  $[\text{ga}]$  represent the concentration of general acids (e.g., bisulfate, mol/L), of which reaction rate is taken to be  $2.0 \times 10^4 \text{ (M/s)}$ . All the key parameters applied here are consistent with Gaston et al. (2014).

**Table S1** RF model performance for testing dataset.

|                  | $R^2$ | MSE   | RMSE | MAE  |
|------------------|-------|-------|------|------|
| Training dataset | 0.91  | 0.012 | 0.11 | 0.07 |
| Testing dataset  | 0.80  | 0.008 | 0.09 | 0.07 |

Note: MSE: mean square error; RMSE: root-mean-square error; MAE: mean absolute error.

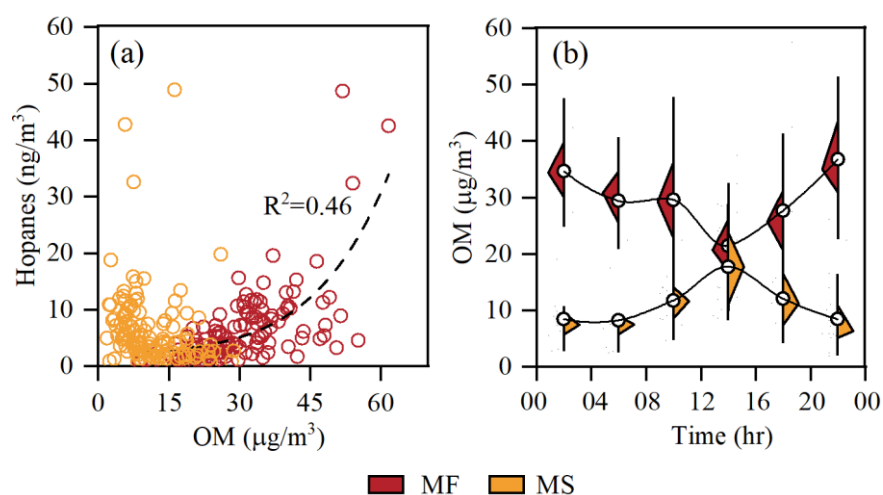

**Figure S1** The fit regressions for OM with hopanes (a) and diurnal cycle of OM (b) at both sampling sites.

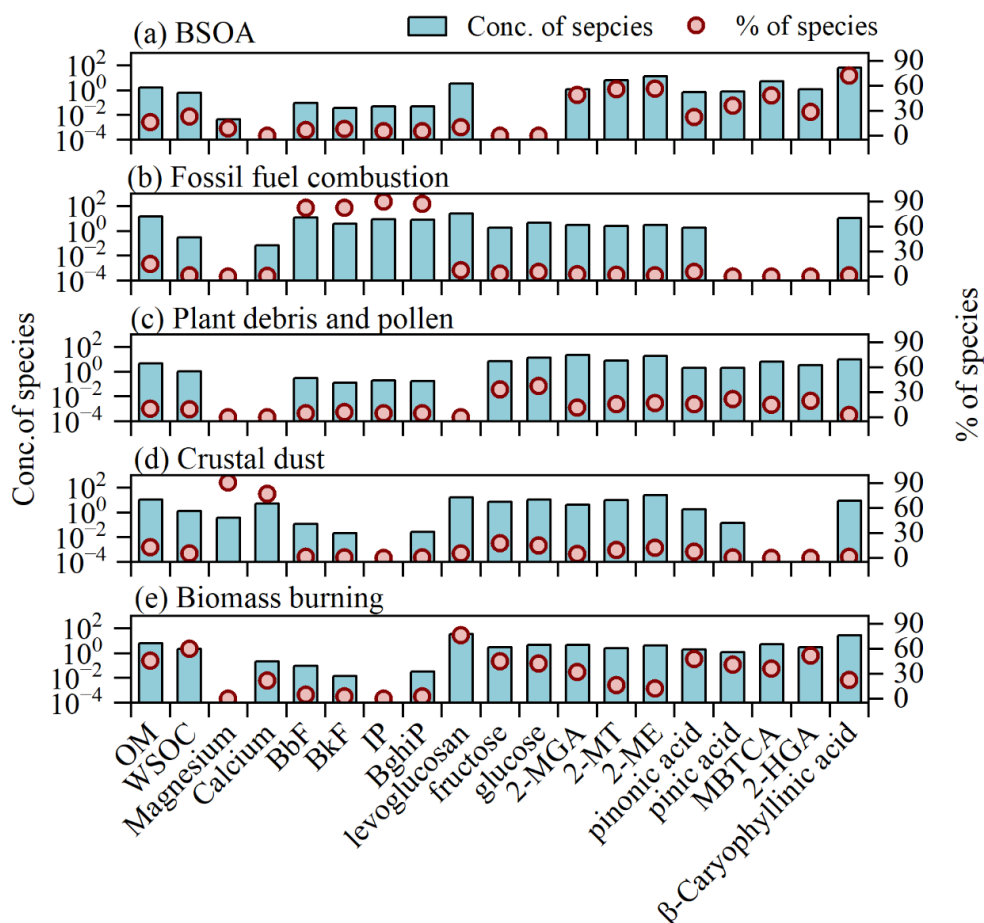

**Figure S2** Factor profiles resolved by PMF mode for OM source apportionment.

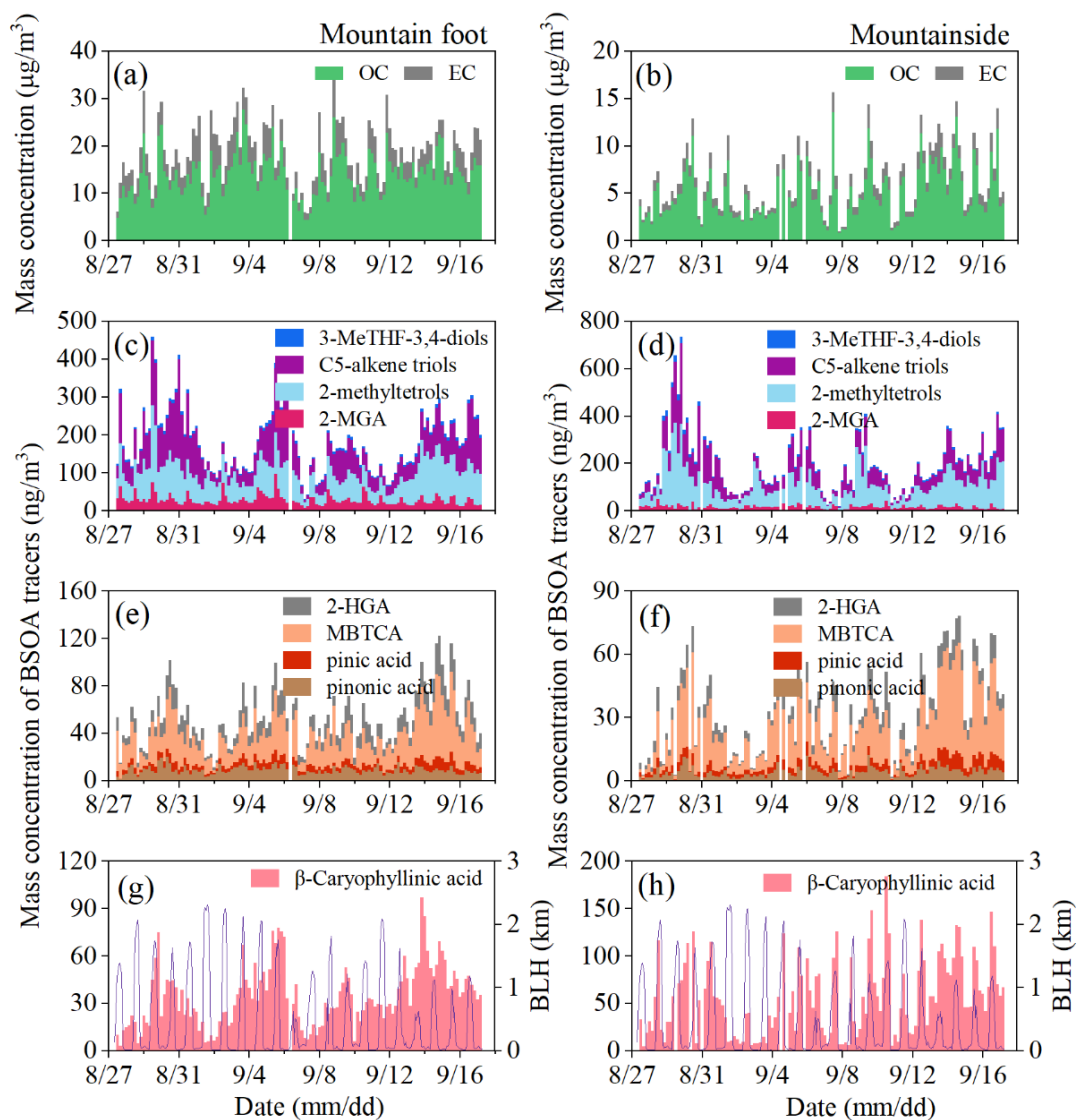

**Figure S3** Time series of the mass concentration of BSOA tracers and boundary layer height (BLH) at both sampling sites.

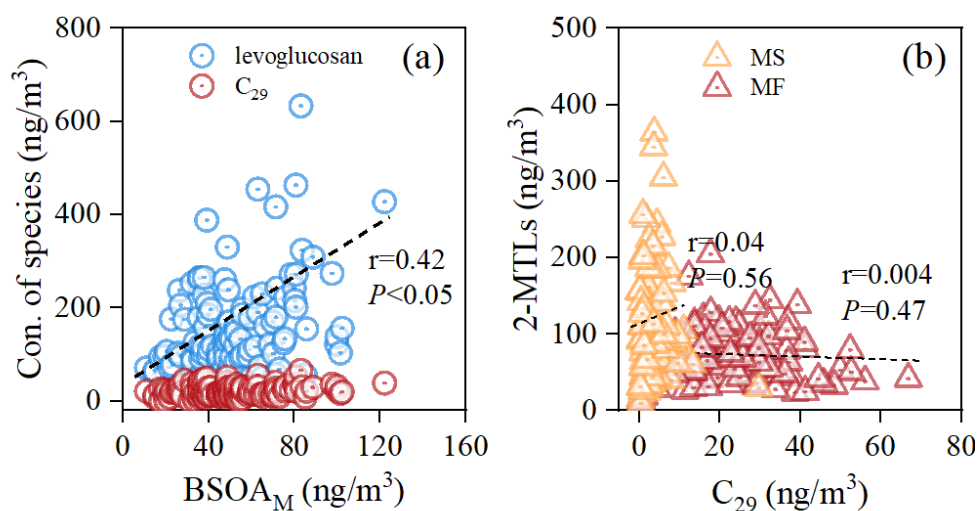

**Figure S4** Correlation of BSOA<sub>M</sub> with levoglucosan and C<sub>29</sub>-alkane at MF site

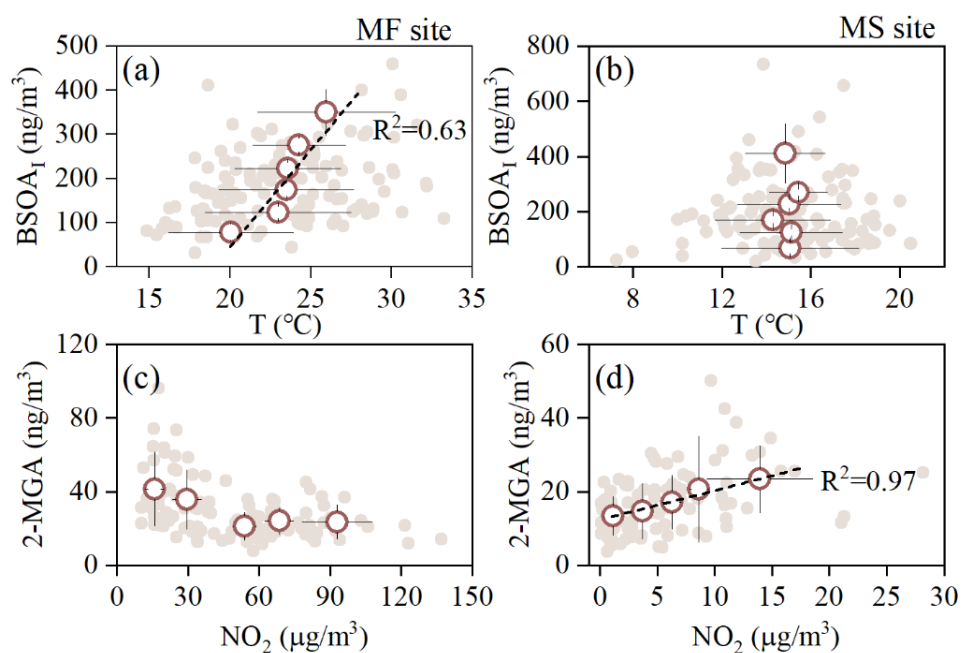

**Figure S5** Linear correlations of BSOA<sub>I</sub> with temperature (a and b), and 2-MGA with NO<sub>2</sub> (c and d) at both sampling sites.

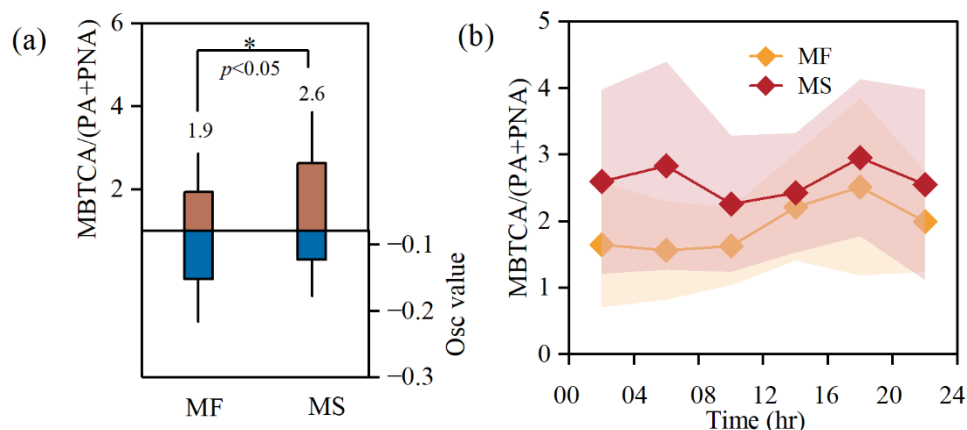

**Figure S6** A comparison of BSOA<sub>M</sub> tracer among two sampling sites; (a) aging state, (b) diurnal variation of MBTCA/(PA+PNA) ratio. (Error bar of Osc value has been reduced by half)

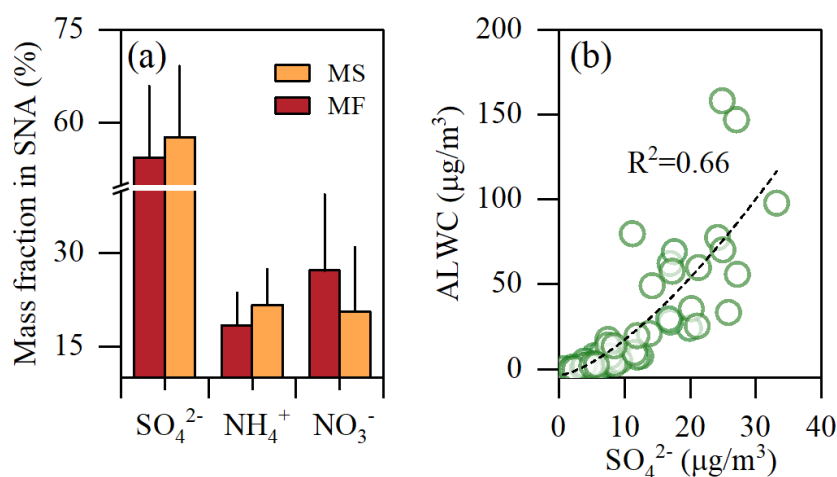

**Figure S7** The comparison of proportions in daytime SNA between the two Sampling Sites (a); ALWC as a function of daytime sulfate at MS site (b).

## References

- Breiman, L.: Random forests, Machine Learning, 45, 5-32, 10.1023/a:1010933404324, 2001.
- Cao, C.: Vertical distribution of physical and chemical characteristics of PM<sub>2.5</sub> at Mt. Hua and the new particle formation, 2018.
- Gaston, C. J., Riedel, T. P., Zhang, Z., Gold, A., Surratt, J. D., and Thornton, J. A.: Reactive Uptake of an Isoprene-Derived Epoxydiol to Submicron Aerosol Particles, Environmental Science & Technology, 48, 11178-11186, 10.1021/es5034266, 2014.
- Mantel, N.: The detection of disease clustering and a generalized regression approach, Cancer research, 27, 209-220, 1967.
